# Supplementary material for: Inorganic anion recognition in aqueous solution by coupling nearby highly hydrophilic and hydrophobic moieties in a macrocyclic receptor
Source: Royal Society of Chemistry journal article supplement (doi:10.1039/d3dt00682d), 2023-01-01
Supplement: d3dt00682d1.pdf [file d3dt00682d1.pdf]

## Electronic Supporting Information

### Alchemical transformation method

Alchemical MD simulations have been performed using the simulation setup described in the main text (number of water molecules, force field, temperature, pressure, setup for Lennard-Jones and electrostatic interactions, time step, etc.). Using this methodology, the binding free energy of the macrocycle-anion system can be computed through a thermodynamic cycle as follows:<sup>1</sup>

$$\Delta G^\circ = \Delta G_2^\circ - \Delta G_1^\circ \quad (1)$$

Where  $\Delta G_2^\circ$  is the hydration free energy of the anion and  $\Delta G_1^\circ$  is the free energy for decoupling the anion from the rest of the system (macrocycle and solvent). In the present context, the term “decoupled molecule” is used to indicate a state in which all interactions of the molecule with the rest of the system are switched off. To compute  $\Delta G_1^\circ$ , we have used the single-point alchemical-path scheme introduced in Refs. 1 and 2. In this approach, we need to identify a coordinate for defining the position of the anion relative to the macrocycle. Here, we adopt the distance  $r$  between the anion (P and S atoms in the cases of  $\text{H}_2\text{PO}_4^-$  and  $\text{SO}_4^{2-}$  anions) and the centroid defined by the atoms of the  $\text{H}_4\text{L}^{4+}/\text{H}_5\text{L}^{5+}$  moiety (specifically, the C and N atoms of the aromatic condensed rings). Then, a specific value of  $r$ , say  $r'$ , must be chosen to identify a generic bound state of the system. The choice of an optimal  $r'$  is not mandatory, provided that  $r'$  represents the bound state satisfactorily (according to chemical intuition). We have chosen  $r' = 4 \text{ \AA}$ . Once  $r'$  is defined, the decoupling free energy  $\Delta G_1^\circ$  is computed as

$$\Delta G_1^\circ = \phi(1, r') - \phi(0, r') - RT \ln \left( \frac{\rho(r')}{C^\circ} \right) \quad (2)$$

where  $\rho(r')$  is the probability density of finding the system in a configuration  $r = r'$  during an equilibrium MD simulation of the bounded state,  $\phi(1, r')$  is the potential of mean force of a configuration with  $r = r'$  and the anion decoupled from the rest of the system and  $\phi(0, r')$  is the potential of mean force with all the potential in place. Finally,  $C^\circ$  is the standard concentration (1 M or 1 molecule /  $1661 \text{ \AA}^3$ ),  $R$  the ideal gas constant and  $T$  the absolute temperature. We have calculated  $\rho(r')$  from standard MD simulations of the bounded state of the macrocycle-anion complexes. In particular, we performed a simulation lasting 5 ns. Evaluation of the quantity  $\phi(1, r') - \phi(0, r')$  has been done through nonequilibrium simulations during which the anion has been decoupled from the rest of the system, namely macrocycle and solvent. The initial microstates have been sampled from an equilibrium simulation of the fully coupled system, enforcing a stiff harmonic restraint of type  $U(r) = k(r - r')^2$ . The equilibrium distance is clearly  $r' = 4 \text{ \AA}$ , while the force constant  $k$  is  $1000 \text{ kcal mol}^{-1} \text{ \AA}^{-2}$ . For all systems, 500 microstates (atomic coordinates and velocities) have been stored at regular time intervals of 3 ps, after an equilibration phase of 2 ns. Starting from the saved microstates, nonequilibrium alchemical trajectories of 120 ps have been realized. During each trajectory, the interaction potential of the anion with the rest of the system is externally modulated under an established linear protocol, leading the system from the coupled to the uncoupled state, while leaving in place the restraining potential  $U(r)$ . In particular, all nonequilibrium alchemical trajectories have been realized by switching off the electrostatic interactions in the first half of the run, that is, from 0 to 60 ps, while the Lennard-Jones interactions have been switched off in the second half of the run, from 60 to 120 ps. The functional form of the switched interaction potential is in accord with that of Ref. 3. During each decoupling simulation, the nonequilibrium work  $W$  is

computed thus obtaining 500 sampled work values. This set of values has finally been used in the Jarzynski relationship<sup>4</sup> to obtain  $\phi(1, r') - \phi(0, r')$ :

$$\phi(1, r') - \phi(0, r') = -RT \ln \langle \exp(-W/(RT)) \rangle \quad (3)$$

where the exponential average  $\langle \dots \rangle$  is evaluated using the 500 work samples. To calculate the hydration free energy  $\Delta G_2^\circ$  entering eq. 1, alchemical MD simulations of the only decoupling process of the solvated anion have been realized. Initial microstates are sampled from an equilibrium simulation of the anion in aqueous solution, without enforcing any restraint to the anion. A total of 500 microstates were stored every 3 ps. The functional form of the switched interaction potential, as well as the time schedule for the alchemical parameter, are equal to those applied in the alchemical trajectories described above. Then nonequilibrium decoupling simulations have been carried out to get 500 work samples, eventually employed in the Jarzynski relationship (eq. 3) to get the opposite of  $\Delta G_2^\circ$ . We finally point out that changes in volume upon decoupling have been disregarded in the calculation, because constant-pressure constant-temperature equations of motion are employed.

### Flexibility of the alkyl chain: the root mean square displacement

The root mean square displacement (RMSD) for a given configuration of the macrocycle picked from the MD simulation is defined considering the experimental structure as the reference one. Denoting the vector position of an atom  $i$  of the simulated structure at time  $t$  as  $\mathbf{r}_{i,t,\text{MD}}$  and the vector position of the same atom in experimental structure as  $\mathbf{r}_{i,\text{exp}}$ , then the RMSD for the configuration  $t$  is defined as

$$\text{RMSD}(t) = \sqrt{1/N \sum_{i=1}^N |\mathbf{r}_{i,t,\text{MD}} - \mathbf{r}_{i,\text{exp}}|^2} \quad (4)$$

where the sum runs over all the atoms of interest. In our case, as we want to evaluate the flexibility of the alkyl chain of the macrocycle, the atoms of interest are all the N and C atoms of the alkyl chain (the atoms of the condensed aromatic rings are excluded). It is important to note that, before applying eq. 4, the macrocycle configuration obtained from the simulation is roto-translated so as to overlap the three condensed aromatic rings with the experimental ones. Here, the optimal overlap is obtained by minimizing the RMSD computed over the C and N atoms of the aromatic rings. The RMSD computed from MD simulations of various complexes is reported in the Figures S2 and S3.

### Geometrical criteria to identify the poses of the complexes

The populations of the various poses observed during the MD simulations of the complexes and reported in the Figures 8-11 of the main text have been roughly estimated by simply counting the number of times the anion (or the P and S atoms in the case of  $\text{H}_2\text{PO}_4^-$  and  $\text{SO}_4^{2-}$ ) is found in established  $R$  and  $\theta$  ranges, where  $R$  is the distance of the anion (or the P and S atoms) from the centroid of the three aromatic rings and  $\theta$  is the angle formed by the vector position of the anion (or the P and S atoms), relative to the centroid of the aromatic rings, and the normal to the aromatic rings. Given a system with two poses, say,  $A$  and  $B$ , counted  $n_A$  and  $n_B$  times during the simulation run, the percentage populations are  $100 n_A/(n_A + n_B)$  and  $100 n_B/(n_A + n_B)$ . In Tables S8 and S9, we report the  $R$  and  $\theta$  ranges employed for the various poses related to the complex in the tetra- and pentaprotonated forms, respectively.

## References

1. Giovannelli, E.; Procacci, P.; Cardini, G.; Pagliai, M.; Volkov, V.; Chelli R. Binding free energies of host-guest systems by nonequilibrium alchemical simulations with constrained dynamics: Theoretical framework. *J. Chem. Theory Comput.* 2017, 13, 5874-5886.
2. Giovannelli, E.; Cioni, M.; Procacci, P.; Cardini, G.; Pagliai, M.; Volkov, V.; Chelli R. Binding free energies of host-guest systems by nonequilibrium alchemical simulations with constrained dynamics: Illustrative calculations and numerical validation. *J. Chem. Theory Comput.* 2017, 13, 5887-5899.
3. Procacci, P.; Cardelli, C. Fast switching alchemical transformations in molecular dynamics simulations. *J. Chem. Theory Comput.* 2014, 10, 2813-2823.
4. Jarzynski, C. Nonequilibrium equality for free energy differences. *Phys. Rev. Lett.* 1997, 78, 2690-2693.

**Table S1.** Crystal data and refinement parameters for H<sub>5</sub>LCI<sub>5</sub>·4H<sub>2</sub>O (1) (a), H<sub>5</sub>LBr<sub>5</sub>·4H<sub>2</sub>O (2) (b), H<sub>5</sub>L(NO<sub>3</sub>)<sub>5</sub>·3H<sub>2</sub>O (3) (c), H<sub>5</sub>L(H<sub>2</sub>PO<sub>4</sub>)<sub>5</sub>·(H<sub>3</sub>PO<sub>4</sub>)<sub>2</sub>·4H<sub>2</sub>O (4).

|                                   | (1)                                                                           | (2)                                                                           | (3)                                                             | (4)                                                                           |
|-----------------------------------|-------------------------------------------------------------------------------|-------------------------------------------------------------------------------|-----------------------------------------------------------------|-------------------------------------------------------------------------------|
| Empirical formula                 | C <sub>24</sub> H <sub>46</sub> Cl <sub>5</sub> N <sub>5</sub> O <sub>4</sub> | C <sub>24</sub> H <sub>46</sub> Br <sub>5</sub> N <sub>5</sub> O <sub>4</sub> | C <sub>24</sub> H <sub>44</sub> N <sub>10</sub> O <sub>18</sub> | C <sub>24</sub> H <sub>62</sub> N <sub>5</sub> O <sub>32</sub> P <sub>7</sub> |
| Formula weight                    | 645.91                                                                        | 868.21                                                                        | 760.69                                                          | 1149.57                                                                       |
| Temperature (K)                   | 293                                                                           | 293                                                                           | 293                                                             | 293                                                                           |
| Crystal system                    | triclinic                                                                     | triclinic                                                                     | triclinic                                                       | triclinic                                                                     |
| space group                       | <i>P</i> -1                                                                   | <i>P</i> -1                                                                   | <i>P</i> -1                                                     | <i>P</i> -1                                                                   |
| a (Å)                             | 7.688(1)                                                                      | 7.806(1)                                                                      | 7.664(1)                                                        | 11.961(2)                                                                     |
| b (Å)                             | 13.744(2)                                                                     | 13.978(1)                                                                     | 11.930(1)                                                       | 13.583(2)                                                                     |
| c (Å)                             | 15.732(2)                                                                     | 16.174(2)                                                                     | 19.291(2)                                                       | 15.357(2)                                                                     |
| α (°)                             | 80.34(1)                                                                      | 80.313(8)                                                                     | 78.898(9)                                                       | 85.66(1)                                                                      |
| β (°)                             | 79.66(1)                                                                      | 78.81(1)                                                                      | 82.80(1)                                                        | 75.95(1)                                                                      |
| γ (°)                             | 79.50(1)                                                                      | 78.280(9)                                                                     | 87.09(1)                                                        | 69.72(1)                                                                      |
| Volume (Å <sup>3</sup> )          | 1592.1(4)                                                                     | 1679.8(3)                                                                     | 1716.5(3)                                                       | 2270.2(6)                                                                     |
| Z                                 | 2                                                                             | 2                                                                             | 2                                                               | 2                                                                             |
| Independent reflections / R(int)  | 3096/ 0.0679                                                                  | 3257/ 0.0946                                                                  | 3329/ 0.0352                                                    | 5767/ 0.0650                                                                  |
| μ (mm <sup>-1</sup> )             | 4.455<br>(Cu-Kα)                                                              | 7.533<br>(Cu-Kα)                                                              | 1.094<br>(Cu-Kα)                                                | 3.520<br>(Cu-Kα)                                                              |
| R indices [I>2σ(I)] <sup>a</sup>  | R1 =0.0523                                                                    | R1 =0.0552                                                                    | R1 =0.0944                                                      | R1 = 0.0740                                                                   |
|                                   | wR2 = 0.1428                                                                  | wR2 =0.1471                                                                   | wR2 =0.2592                                                     | wR2 =0.1821                                                                   |
| R indices (all data) <sup>a</sup> | R1 =0.0791                                                                    | R1 = 0.0711                                                                   | R1 =0.1530                                                      | R1 =0.1491                                                                    |
|                                   | wR2 = 0.1594                                                                  | wR2 =0.1609                                                                   | wR2 =0.2906                                                     | wR2 =0.2009                                                                   |

<sup>a</sup> R1 =  $\sum ||F_o| - |F_c|| / \sum |F_o|$  ; wR2 =  $[\sum w(F_o^2 - F_c^2)^2 / \sum wF^2]$

**Table S2.** H-bond contacts in the crystal structure of **1**

|           | <b>d (Å)</b> | <b>D-H-A (deg)</b> | <b>Symmetry operator to be applied to the second atom</b> |
|-----------|--------------|--------------------|-----------------------------------------------------------|
| N2···Cl1  | 3.075(5)     | 163.0(3)           |                                                           |
| N2···Cl5  | 3.019(5)     | 165.5(3)           |                                                           |
| N3···Cl2  | 3.150(5)     | 172.0(3)           |                                                           |
| N5···Cl4  | 3.089(5)     | 171.4(3)           |                                                           |
| N3···Cl3  | 3.157(5)     | 157.7(3)           |                                                           |
| N1···Cl2  | 3.123(5)     | 168.2(3)           | -x+1,-y+1,-z+2                                            |
| N5···Cl1  | 3.148(4)     | 160.2(3)           | x-1,+y+1,+z                                               |
| N4···OW3  | 2.821(7)     | 161.3(3)           |                                                           |
| N4···OW1  | 2.781(6)     | 167.0(3)           |                                                           |
| Cl2···OW1 | 3.175(4)     |                    |                                                           |
| Cl4···OW1 | 3.102(4)     |                    |                                                           |
| Cl1···OW2 | 3.128(4)     |                    | -x+2,-y+1,-z+1                                            |
| Cl3···OW2 | 3.227(5)     |                    | -x+2,-y+1,-z+1                                            |
| Cl3···OW3 | 3.241(5)     |                    | x+1,+y,+z                                                 |
| Cl5···OW1 | 3.858(4)     |                    | x,+y-1,+z                                                 |
| Cl5···OW4 | 3.882(6)     |                    | x,+y-1,+z                                                 |
| Cl5···OW4 | 3.103(6)     |                    | -x+2,-y+1,-z+1                                            |
| OW2···OW4 | 2.897(8)     |                    |                                                           |
| OW3···OW4 | 2.725(7)     |                    | x-1,+y,+z                                                 |

**Table S3** – H-bond contacts in the crystal structure of **2**

|           | d (Å)    | D-H-A (deg) | Symmetry operator to be applied to the second atom |
|-----------|----------|-------------|----------------------------------------------------|
| N2···Br5  | 3.185(8) | 164.7(5)    |                                                    |
| N3···Br3  | 3.296(8) | 169.1(5)    |                                                    |
| N3···Br2  | 3.286(8) | 151.5(6)    |                                                    |
| N5···Br1  | 3.293(7) | 156.6(5)    |                                                    |
| N5···Br4  | 3.258(9) | 171.5(5)    |                                                    |
| N1···Br3  | 3.307(9) | 169.6(5)    | -x+1,-y,-z+1                                       |
| N2···Br1  | 3.220(9) | 166.1(5)    | x+1,+y-1,+z                                        |
| N4···OW1  | 2.85(1)  | 159.7(6)    |                                                    |
| N4···OW4  | 2.80(1)  | 167.9(6)    |                                                    |
| Br1···OW2 | 3.265(7) |             |                                                    |
| Br3···OW4 | 3.300(7) |             |                                                    |
| Br4···OW4 | 3.248(7) |             |                                                    |
| OW1···OW3 | 2.71(1)  |             |                                                    |
| OW1···Br2 | 3.365(8) |             | x-1,+y,+z                                          |
| OW2···Br2 | 3.370(8) |             | x-1,+y+1,+z                                        |
| OW2···OW3 | 2.82(2)  |             | -x,-y+1,-z                                         |
| OW3···Br5 | 3.96(1)  |             | x-1,+y+1,+z                                        |
| OW3···Br5 | 3.27(1)  |             | -x+1,-y,-z                                         |
| OW3···OW2 | 2.82(2)  |             | -x,-y+1,-z                                         |
| OW4···Br5 | 3.921(7) |             | x,+y+1,+z                                          |

**Table S4.** H-bond contacts in the crystal structure of **3**

|           | d (Å)    | D-H-A (deg) | Symmetry operator to be applied to the second atom |
|-----------|----------|-------------|----------------------------------------------------|
| N2···O71  | 2.95(1)  | 149.8(5)    |                                                    |
| N2···O72  | 3.02(1)  | 150.7(5)    |                                                    |
| N4···O81  | 2.78(1)  | 169.8(6)    |                                                    |
| N4···O61  | 2.99(1)  | 152.2(5)    |                                                    |
| N5···O103 | 2.859(9) | 175.8(4)    |                                                    |
| N5···O92  | 2.80(1)  | 169.5(4)    |                                                    |
| N1···O101 | 2.907(9) | 156.6(5)    | x,+y+1,+z                                          |
| N2···OW1  | 2.79(1)  | 171.2(5)    |                                                    |
| N3···OW3  | 2.88(1)  | 152.2(5)    |                                                    |
| N3···OW2  | 2.77(1)  | 167.8(5)    |                                                    |
| O61···OW2 | 3.10(1)  |             |                                                    |
| O61···OW3 | 3.15(1)  |             |                                                    |
| O62···OW3 | 2.81(1)  |             |                                                    |
| OW1···OW3 | 3.29(1)  |             |                                                    |
| OW2···OW3 | 3.98(1)  |             |                                                    |
| OW1···O71 | 2.84(1)  |             | x+1,+y,+z                                          |
| OW1···O82 | 2.81(1)  |             | x-1,+y+1,+z                                        |
| OW1···O83 | 2.98(1)  |             | x-1,+y+1,+z                                        |
| OW2···O63 | 2.78(1)  |             | x-1,+y,+z                                          |
| OW2···O91 | 2.68(1)  |             | x-1,+y,+z                                          |
| OW3···O72 | 3.29(1)  |             | -x,-y,-z+1                                         |

**Table S5.** H-bond contacts in the crystal structure of **4**

|           | d (Å)    | D-H-A (deg) | Symmetry operator to be applied to the second atom |
|-----------|----------|-------------|----------------------------------------------------|
| N1···O63  | 2.654(9) | 176.9(5)    |                                                    |
| N2···O22  | 2.86(1)  | 161.4(5)    |                                                    |
| N5···O42  | 2.841(8) | 162.7(5)    |                                                    |
| N5···O73  | 2.73(2)  | 159.8(6)    |                                                    |
| N3···O33  | 2.839(7) | 161.2(5)    |                                                    |
| N4···O13  | 2.800(8) | 176.3(5)    |                                                    |
| N4···O52  | 2.81(1)  | 162.7(6)    |                                                    |
| N2···O23  | 2.822(7) | 143.4(5)    | -x+2,-y,-z-1                                       |
| N3···O12  | 2.830(8) | 173.0(4)    | -x+2,-y,-z                                         |
| O14···O43 | 2.616(7) |             |                                                    |
| O31···OW1 | 2.84(1)  |             |                                                    |
| O54···OW4 | 2.44(2)  |             |                                                    |
| O11···O12 | 2.556(7) |             | -x+2,-y,-z                                         |
| O13···O23 | 2.508(9) |             | x,+y,+z+1                                          |
| O21···O51 | 2.561(8) |             | x,+y,+z-1                                          |
| O21···OW2 | 2.95(1)  |             | x,+y,+z-1                                          |
| O24···O44 | 2.482(7) |             | -x+2,-y,-z                                         |
| O24···OW3 | 2.75(2)  |             | x,+y,+z-1                                          |
| O22···O42 | 2.46(1)  |             | x,+y,+z-1                                          |
| O34···O53 | 2.52(1)  |             | -x+2,-y+1,-z                                       |
| O33···O32 | 2.531(8) |             | -x+1,-y+1,-z                                       |
| O31···O61 | 2.35(2)  |             | -x+1,-y,-z                                         |
| O41···O41 | 2.461(7) |             | -x+1,-y,-z+1                                       |
| O43···O76 | 2.53(2)  |             | -x+1,-y,-z+1                                       |
| O43···O75 | 2.48(2)  |             | -x+1,-y,-z+1                                       |
| O51···O21 | 2.561(8) |             | x,+y,+z+1                                          |
| O52···O64 | 2.52(1)  |             | x,+y+1,+z                                          |
| O53···O62 | 2.44(1)  |             | -x+2,-y,-z                                         |
| O61···O77 | 2.51(3)  |             | -x+1,-y,-z+1                                       |
| O71···OW2 | 3.11(2)  |             | -x+1,-y+1,-z+1                                     |
| O76···O43 | 2.53(2)  |             | -x+1,-y,-z+1                                       |
| O73···OW1 | 2.92(2)  |             | x,+y,+z+1                                          |
| O73···OW2 | 2.77(2)  |             | -x+1,-y+1,-z+1                                     |
| O77···O61 | 2.51(3)  |             | -x+1,-y,-z+1                                       |
| O77···OW1 | 3.27(2)  |             | x,+y,+z+1                                          |
| O72···OW2 | 2.74(2)  |             | -x+1,-y+1,-z+1                                     |
| O72···OW3 | 2.75(2)  |             | x-1,+y,+z                                          |
| O72···OW4 | 2.57(3)  |             | x-1,+y,+z                                          |
| O74···OW1 | 2.49(3)  |             | x,+y,+z+1                                          |
| O75···O43 | 2.48(2)  |             | -x+1,-y,-z+1                                       |
| O75···OW3 | 2.91(3)  |             | x-1,+y,+z                                          |
| OW1···O61 | 3.95(1)  |             | -x+1,-y,-z                                         |
| OW1···OW2 | 2.75(1)  |             | x,+y,+z-1                                          |
| OW2···OW4 | 2.79(3)  |             | -x+2,-y+1,-z+1                                     |
| OW3···OW4 | 2.92(2)  |             | -x+2,-y+1,-z+1                                     |



**Table S6.** H<sub>5</sub>L<sup>5+</sup> Hirshfeld surface percent composition in compounds **1** and **2**.

| <i>Inside Atom</i> | <i>Outside Atom</i> |          |          |          |          | <i>Total</i> |
|--------------------|---------------------|----------|----------|----------|----------|--------------|
|                    | <i>Cl</i>           | <i>N</i> | <i>H</i> | <i>C</i> | <i>O</i> |              |
| <i>C</i>           | 1.7                 | 0.5      | 3.4      | 4.3      | 0.1      | 9.9          |
| <i>Cl</i>          | .                   | .        | .        | .        | .        | 0.0          |
| <i>H</i>           | 33.6                | 0.1      | 30.0     | 2.6      | 22.8     | 89.2         |
| <i>N</i>           | 0.2                 | .        | 0.3      | 0.4      | .        | 0.9          |
| <i>O</i>           | .                   | .        | .        | .        | .        | 0.0          |
| <i>Total</i>       | 35.5                | 0.6      | 33.7     | 7.4      | 22.9     |              |

| <i>Inside Atom</i> | <i>Outside Atom</i> |          |          |          |          | <i>Total</i> |
|--------------------|---------------------|----------|----------|----------|----------|--------------|
|                    | <i>Br</i>           | <i>N</i> | <i>H</i> | <i>C</i> | <i>O</i> |              |
| <i>Br</i>          | .                   | .        | .        | .        | .        | 0.0          |
| <i>C</i>           | 1.8                 | 0.4      | 3.5      | 4.1      | 0.1      | 9.9          |
| <i>H</i>           | 35.4                | 0.0      | 27.6     | 2.6      | 23.6     | 89.2         |
| <i>N</i>           | 0.2                 | .        | 0.2      | 0.4      | .        | 0.9          |
| <i>O</i>           | .                   | .        | .        | .        | .        | 0.0          |
| <i>Total</i>       | 37.5                | 0.5      | 31.2     | 7.2      | 23.7     |              |

**Table S7.** Calculated and experimental equilibrium constants of the complexes. The calculated values have been established according to the known relation between equilibrium constant and reaction free energy,  $\Delta G^\circ = -RT \ln K$ .

|             | Complexes with $H_4L^{4+}$ |            | Complexes with $H_5L^{5+}$ |             |
|-------------|----------------------------|------------|----------------------------|-------------|
|             | logK (calc.)               | logK (exp) | logK (calc)                | logK (exp.) |
| $F^-$       | 2.1                        | 4.4        | 5.3                        | 5.2         |
| $Cl^-$      | 2.4                        | 3.8        | 3.8                        | 4.7         |
| $Br^-$      | 1.5                        | 3.5        | 2.8                        | 4.3         |
| $I^-$       | 0.9                        | ----       | 1.5                        | 2.9         |
| $H_2PO_4^-$ | 1.1                        | 2.6        | 2.2                        | 2.9         |
| $SO_4^{2-}$ | 1.3                        | ----       | 1.7                        | ----        |

**Table S8.** Ranges for the  $R$  distance and  $\theta$  angle adopted to define the poses of the complexes formed by the macrocycle in the  $H_4L^{4+}$  form. In the first column, the anion involved in the complex is reported.

| Anion                                       | Pose | $R$ (Å) | $\theta$ (degrees) |
|---------------------------------------------|------|---------|--------------------|
| F <sup>-</sup>                              | A1   | 3.5 4.5 | 10 30              |
| F <sup>-</sup>                              | B    | 5.0 8.0 | 15 40              |
| F <sup>-</sup>                              | C    | 5.5 7.5 | 50 75              |
| Cl <sup>-</sup>                             | A    | 3.5 5.0 | 15 35              |
| Cl <sup>-</sup>                             | B    | 5.0 6.5 | 60 85              |
| H <sub>2</sub> PO <sub>4</sub> <sup>-</sup> | A2   | 4.5 6.0 | 25 40              |
| H <sub>2</sub> PO <sub>4</sub> <sup>-</sup> | B2   | 6.5 8.5 | 55 90              |
| H <sub>2</sub> PO <sub>4</sub> <sup>-</sup> | C2   | 7.0 8.0 | 10 40              |
| SO <sub>4</sub> <sup>2-</sup>               | A    | 6.0 9.0 | 10 40              |

**Table S9.** Ranges for the  $R$  distance and  $\theta$  angle adopted to define the poses of the complexes formed by the macrocycle in the  $H_5L^{5+}$  form. In the first column, the anion involved in the complex is reported.

| Anion                                       | Pose | $R$ (Å) | $\theta$ (degrees) |
|---------------------------------------------|------|---------|--------------------|
| F <sup>-</sup>                              | A2   | 3.0 4.5 | 10 35              |
| F <sup>-</sup>                              | B    | 5.5 7.5 | 15 35              |
| F <sup>-</sup>                              | C    | 5.5 7.5 | 50 75              |
| Cl <sup>-</sup>                             | A    | 3.5 5.0 | 10 35              |
| Cl <sup>-</sup>                             | B    | 4.5 6.5 | 60 90              |
| Br <sup>-</sup>                             | A    | 3.5 5.0 | 10 35              |
| Br <sup>-</sup>                             | B    | 5.0 6.0 | 65 85              |
| I <sup>-</sup>                              | A    | 4.0 5.0 | 15 35              |
| I <sup>-</sup>                              | B    | 5.0 6.5 | 65 90              |
| H <sub>2</sub> PO <sub>4</sub> <sup>-</sup> | A1   | 3.8 5.0 | 15 40              |
| H <sub>2</sub> PO <sub>4</sub> <sup>-</sup> | B1   | 6.0 7.0 | 50 65              |
| SO <sub>4</sub> <sup>2-</sup>               | A    | 4.6 6.0 | 35 50              |
| SO <sub>4</sub> <sup>2-</sup>               | B    | 6.5 8.0 | 20 35              |
| SO <sub>4</sub> <sup>2-</sup>               | C    | 6.0 7.0 | 50 65              |

**Table S10.** AMBER atom-types and atomic net charges (obtained from a RESP fit at the HF/6-31G\* level of theory) of chemically non-equivalent atoms of the  $H_4L^{4+}$  species. The atom labels refer to those displayed in Figure S5a.

| Atom label | AMBER atom-type                                              | Charge (e) |
|------------|--------------------------------------------------------------|------------|
| C1         | <b>cb</b> (sp <sup>2</sup> aromatic C)                       | 0.5826325  |
| C2         | <b>cb</b> (sp <sup>2</sup> aromatic C)                       | -0.102485  |
| C3         | <b>cb</b> (sp <sup>2</sup> aromatic C)                       | -0.115467  |
| C4         | <b>cb</b> (sp <sup>2</sup> aromatic C)                       | 0.209435   |
| C5         | <b>cb</b> (sp <sup>2</sup> aromatic C)                       | -0.187675  |
| C6         | <b>cb</b> (sp <sup>2</sup> aromatic C)                       | -0.246825  |
| C7         | <b>ct</b> (sp <sup>3</sup> aliphatic C)                      | -0.262389  |
| C8         | <b>ct</b> (sp <sup>3</sup> aliphatic C)                      | 0.0538445  |
| C9         | <b>ct</b> (sp <sup>3</sup> aliphatic C)                      | -0.0970585 |
| C10        | <b>ct</b> (sp <sup>3</sup> aliphatic C)                      | -0.036029  |
| C11        | <b>ct</b> (sp <sup>3</sup> aliphatic C)                      | -0.0001235 |
| C12        | <b>ct</b> (sp <sup>3</sup> aliphatic C)                      | -0.220219  |
| N1         | <b>nc</b> (sp <sup>2</sup> N in 6 memb. ring with lone pair) | -0.691306  |
| N2         | <b>nt</b> (sp <sup>3</sup> N for amino groups)               | -0.3975315 |
| N3         | <b>nt</b> (sp <sup>3</sup> N for amino groups)               | -0.278185  |
| H1         | <b>ha</b> (H arom. bond. to C without electrwd. groups)      | 0.138089   |
| H2         | <b>ha</b> (H arom. bond. to C without electrwd. groups)      | 0.117314   |
| H3         | <b>ha</b> (H arom. bond. to C without electrwd. groups)      | 0.181126   |
| H4         | <b>ha</b> (H arom. bond. to C without electrwd. groups)      | 0.214891   |
| H5         | <b>h1</b> (H aliph. bond. to C with 1 electrwd. group)       | 0.20238075 |
| H6         | <b>h</b> (H bonded to N)                                     | 0.3802315  |
| H7         | <b>h1</b> (H aliph. bond. to C with 1 electrwd. group)       | 0.06708    |
| H8         | <b>hc</b> (H aliph. bond. to C without electrwd. groups)     | 0.07990675 |
| H9         | <b>h1</b> (H aliph. bond. to C with 1 electrwd. group)       | 0.12755775 |
| H10        | <b>h</b> (H bonded to N)                                     | 0.34080725 |
| H11        | <b>h1</b> (H aliph. bond. to C with 1 electrwd. group)       | 0.1287435  |
| H12        | <b>hc</b> (H aliph. bond. to C without electrwd. groups)     | 0.1380485  |

**Table S11.** AMBER atom-types and atomic net charges (obtained from a RESP fit at the HF/6-31G\* level of theory) of chemically non-equivalent atoms of the  $H_5L^{5+}$  species. The atom labels refer to those displayed in Figure S5b.

| Atom label | AMBER atom-type                                              | Charge (e) |
|------------|--------------------------------------------------------------|------------|
| C1         | <b>cb</b> (sp <sup>2</sup> aromatic C)                       | 0.067853   |
| C2         | <b>cb</b> (sp <sup>2</sup> aromatic C)                       | 0.299417   |
| C3         | <b>cb</b> (sp <sup>2</sup> aromatic C)                       | -0.220544  |
| C4         | <b>cb</b> (sp <sup>2</sup> aromatic C)                       | 0.2766505  |
| C5         | <b>cb</b> (sp <sup>2</sup> aromatic C)                       | -0.105931  |
| C6         | <b>cb</b> (sp <sup>2</sup> aromatic C)                       | -0.169553  |
| C7         | <b>ct</b> (sp <sup>3</sup> aliphatic C)                      | -0.29553   |
| C8         | <b>ct</b> (sp <sup>3</sup> aliphatic C)                      | 0.0292175  |
| C9         | <b>ct</b> (sp <sup>3</sup> aliphatic C)                      | -0.086072  |
| C10        | <b>ct</b> (sp <sup>3</sup> aliphatic C)                      | -0.091194  |
| C11        | <b>ct</b> (sp <sup>3</sup> aliphatic C)                      | -0.110097  |
| C12        | <b>ct</b> (sp <sup>3</sup> aliphatic C)                      | -0.094870  |
| N1         | <b>nc</b> (sp <sup>2</sup> N in 6 memb. ring with lone pair) | -0.146397  |
| N2         | <b>nt</b> (sp <sup>3</sup> N for amino groups)               | -0.422922  |
| N3         | <b>nt</b> (sp <sup>3</sup> N for amino groups)               | -0.2477405 |
| H1         | <b>ha</b> (H arom. bond. to C without electrwd. groups)      | 0.215994   |
| H2         | <b>ha</b> (H arom. bond. to C without electrwd. groups)      | 0.1553605  |
| H3         | <b>ha</b> (H arom. bond. to C without electrwd. groups)      | 0.1961905  |
| H4         | <b>ha</b> (H arom. bond. to C without electrwd. groups)      | 0.217083   |
| H5         | <b>h1</b> (H aliph. bond. to C with 1 electrwd. group)       | 0.228113   |
| H6         | <b>h</b> (H bonded to N)                                     | 0.40155875 |
| H7         | <b>h1</b> (H aliph. bond. to C with 1 electrwd. group)       | 0.08162975 |
| H8         | <b>hc</b> (H aliph. bond. to C without electrwd. groups)     | 0.0851305  |
| H9         | <b>h1</b> (H aliph. bond. to C with 1 electrwd. group)       | 0.15115025 |
| H10        | <b>h</b> (H bonded N)                                        | 0.332749   |
| H11        | <b>h1</b> (H aliph. bond. to C with 1 electrwd. group)       | 0.162618   |
| H12        | <b>hc</b> (H aliph. bond. to C without electrwd. groups)     | 0.118768   |
| H13        | <b>h</b> (H bonded N)                                        | 0.348217   |

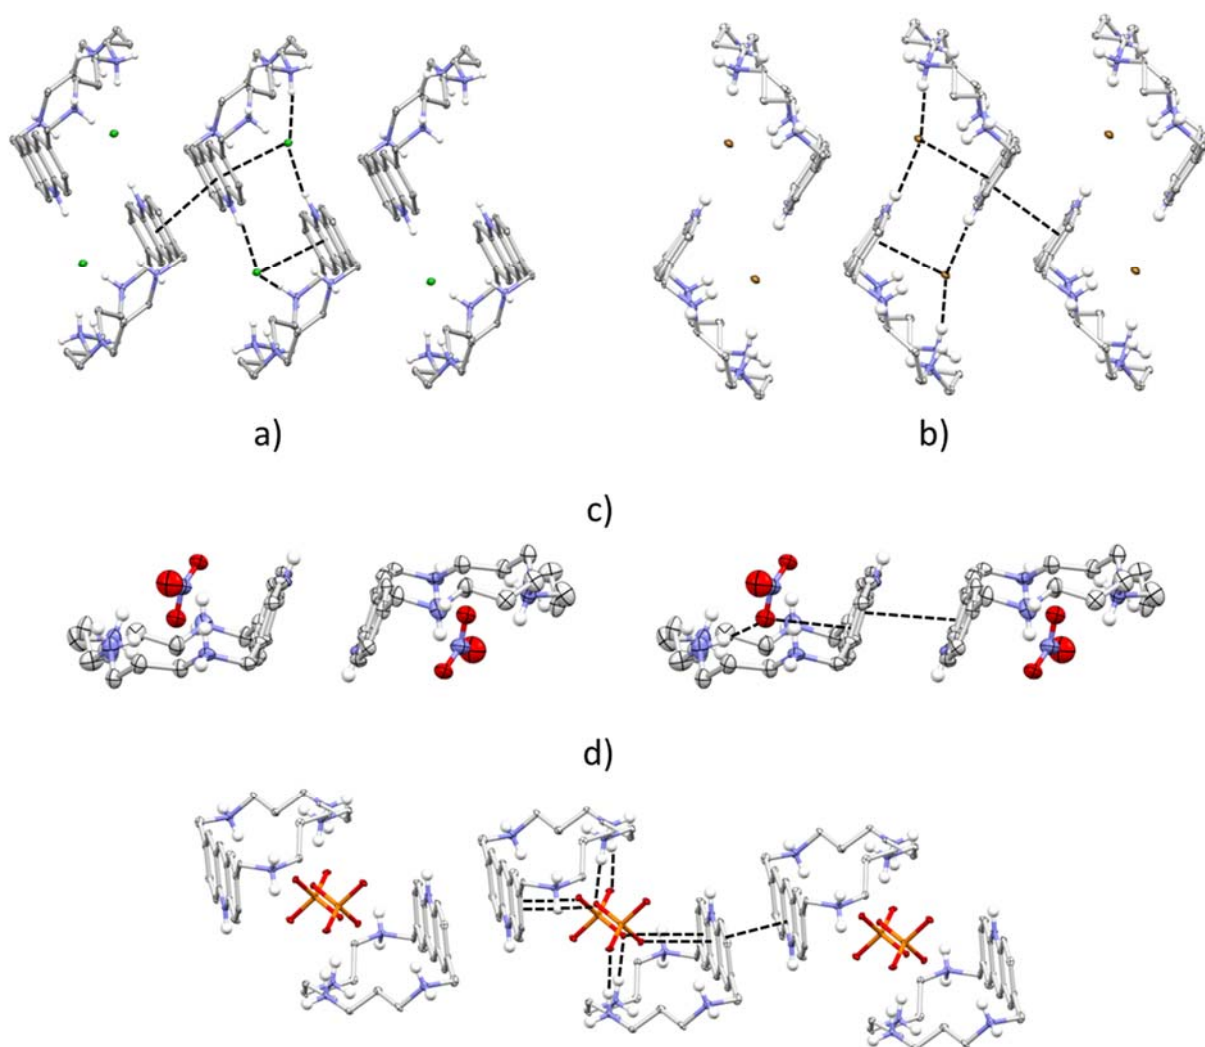

**Figure S1.** Details of the crystal packing of complexes 1-4 (a to d, respectively)

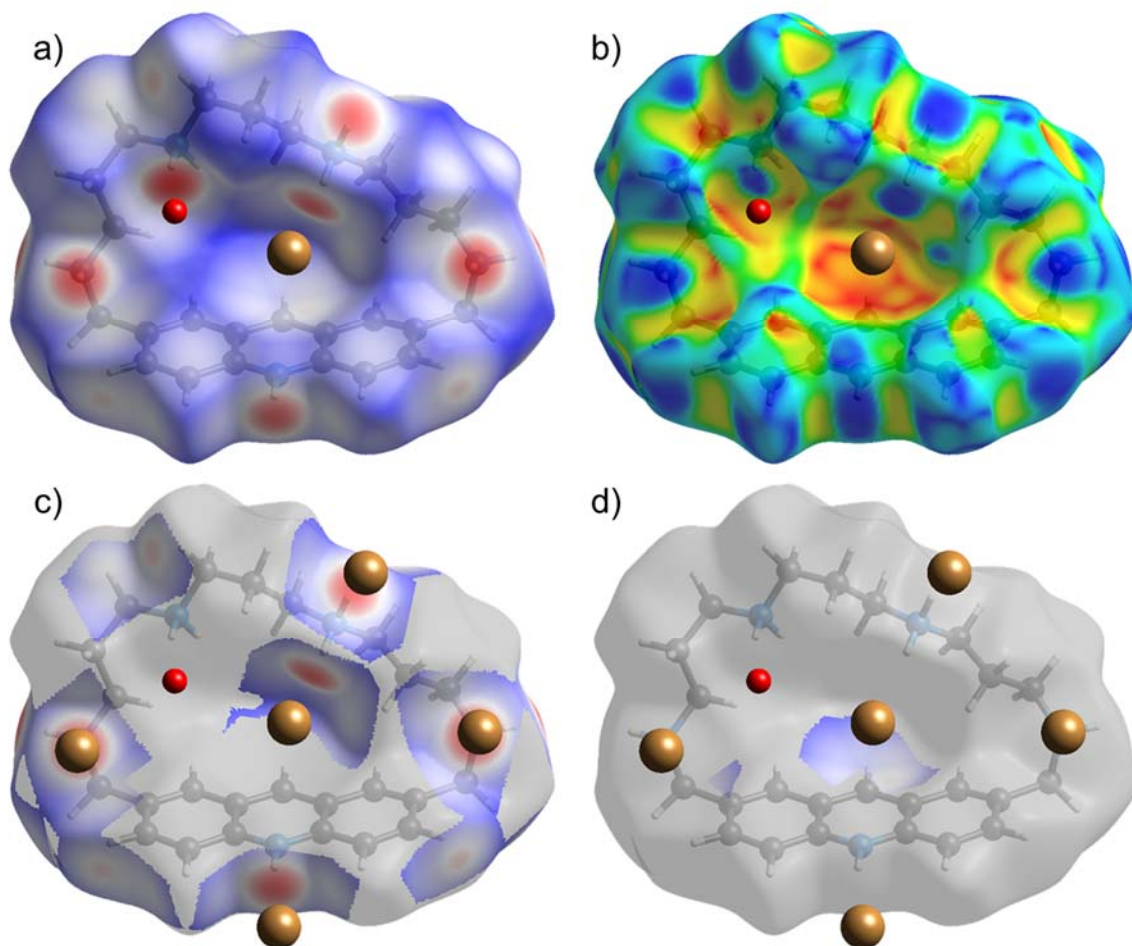

**Figure S2.** Ligand Hirshfeld surface in compound **2**. a) contact distance ( $d_{\text{norm}}$ ) standard coloring. b) shape index coloring; c) visualization of  $\text{H}\cdots\text{Br}$  contacts, corresponding to  $\text{CH}\cdots\text{anion}$  (weak interactions) and  $^+\text{NH}\cdots\text{Br}$  salt-bridges (red interaction hotspots,  $\text{Br}^-$  anions in contact shown); d) visualization of  $\text{C}\cdots\text{Br}$  contacts (anion $\cdots\pi$  interactions) which highlight the involvement of the whole central heterocycle.

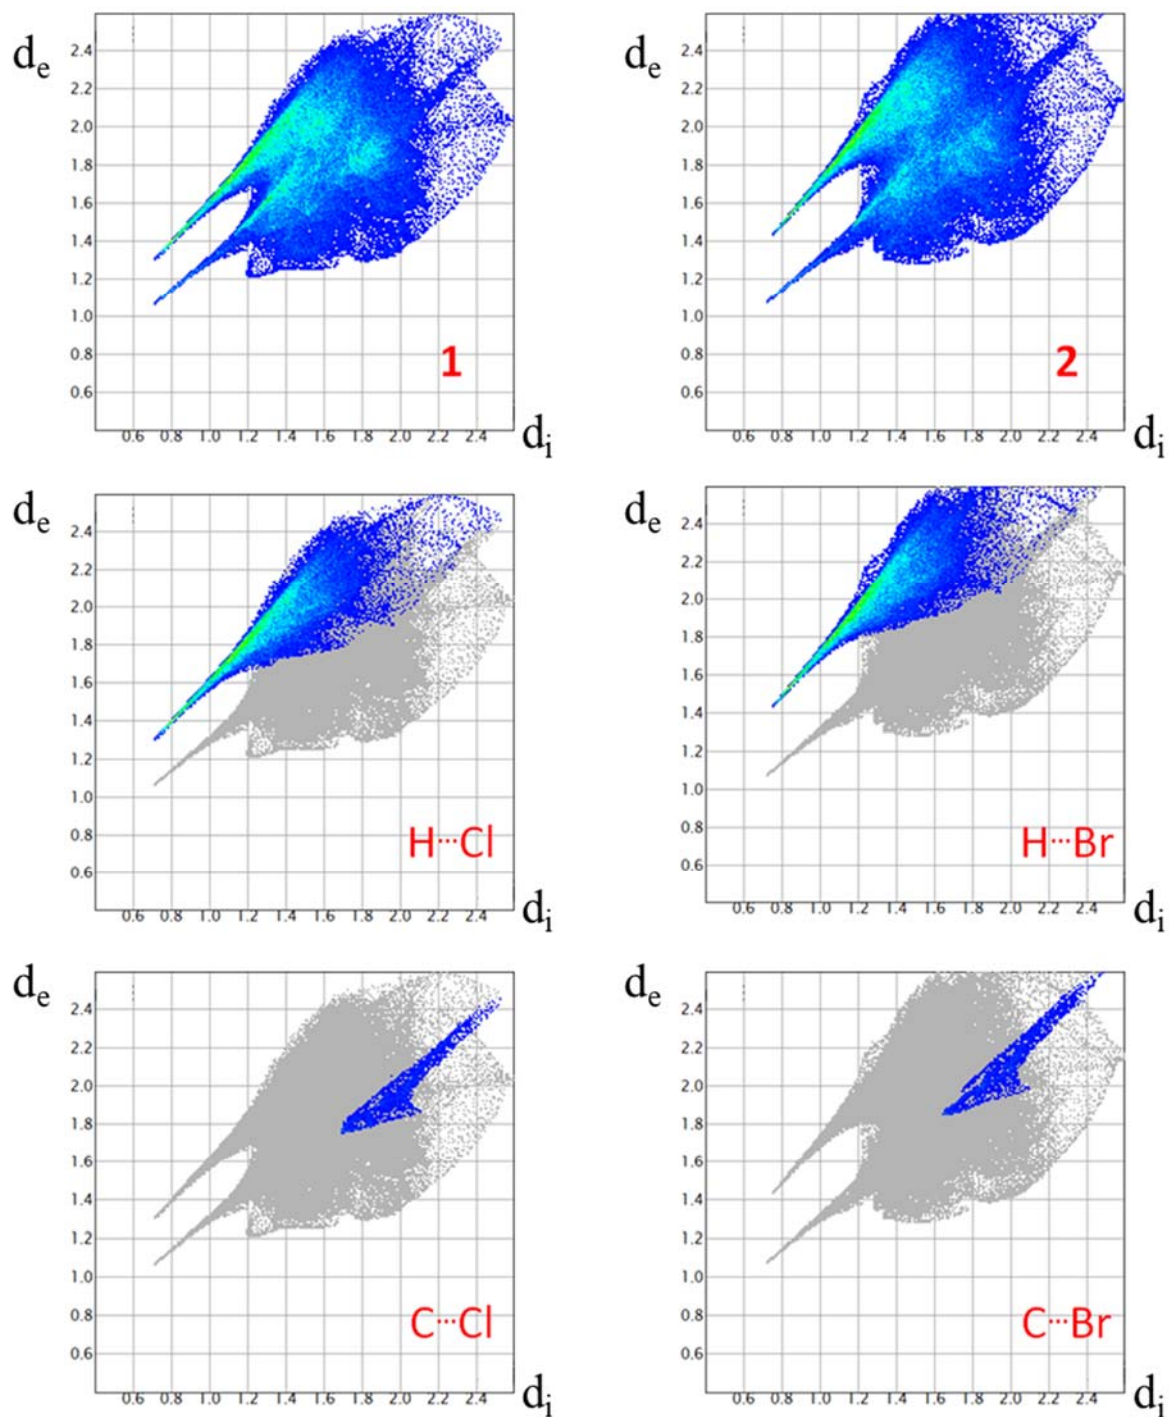

**Figure S3.** Plots of external vs. internal distances ( $d_e$  and  $d_i$ , respectively) from the Hirshfeld surface of  $H_5L^{5+}$  (fingerprint plots) in **1** and **2** (top), with details of H...anion contacts (middle) and C...anion contacts (anion- $\pi$  interactions) (bottom).



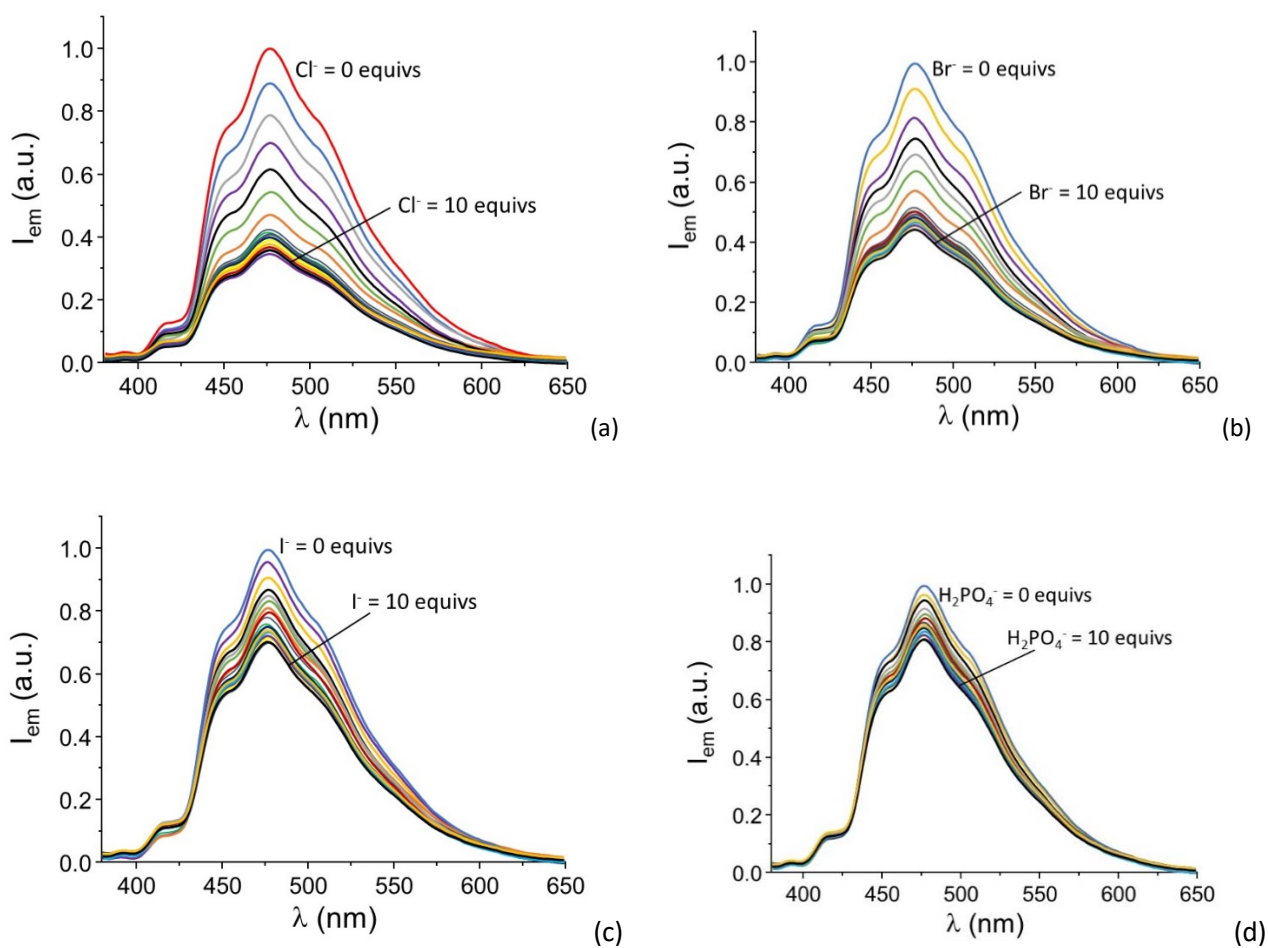

**Figure S4.** Emission spectra of L in the presence of increasing amounts (up to 10 equivs.) of  $\text{Cl}^-$  (a),  $\text{Br}^-$  (b),  $\text{I}^-$  (c) and  $\text{H}_2\text{PO}_4^-$  (d) at pH 3.5 ( $T = 298$  K,  $\lambda_{exc} = 370$  nm).

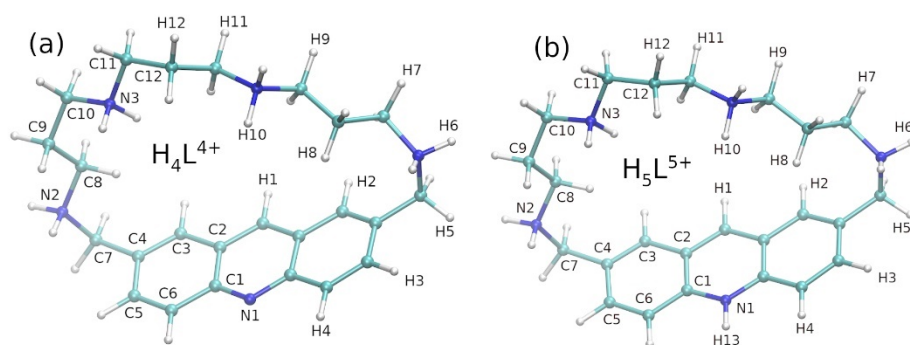

**Figure S5.** Ball and stick representations of the  $H_4L^{4+}$  (a) and  $H_5L^{5+}$  (b) species. Only the labels of chemically non-equivalent atoms are reported (cyan: C atoms; blue: N atoms; white: H atoms).

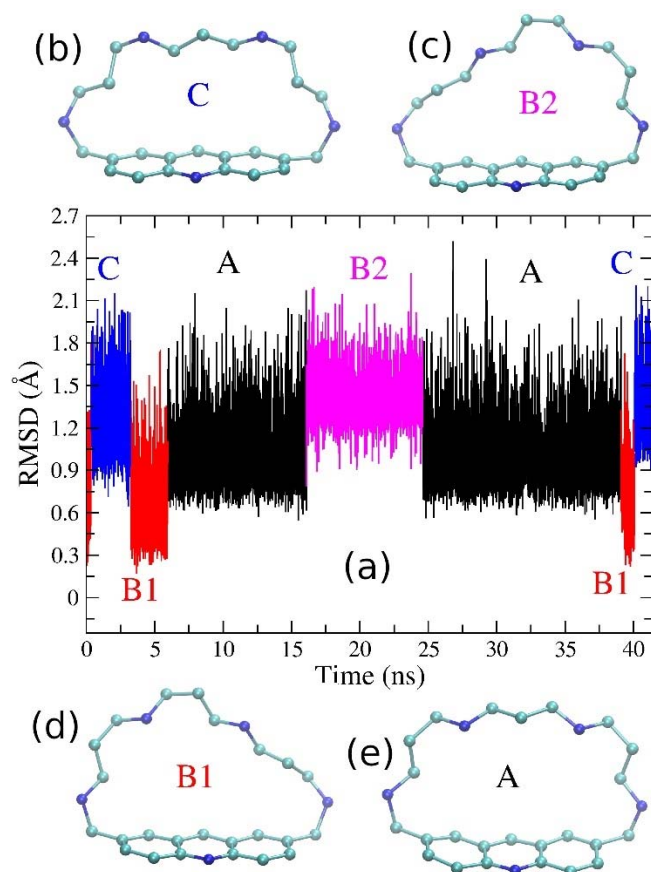

**Figure S6.** RMSD as a function of time calculated from a MD simulation of the  $[\text{H}_4\text{LCI}]^{3+}$  complex (a). The conformational assignment is also reported (b, c, d and e).

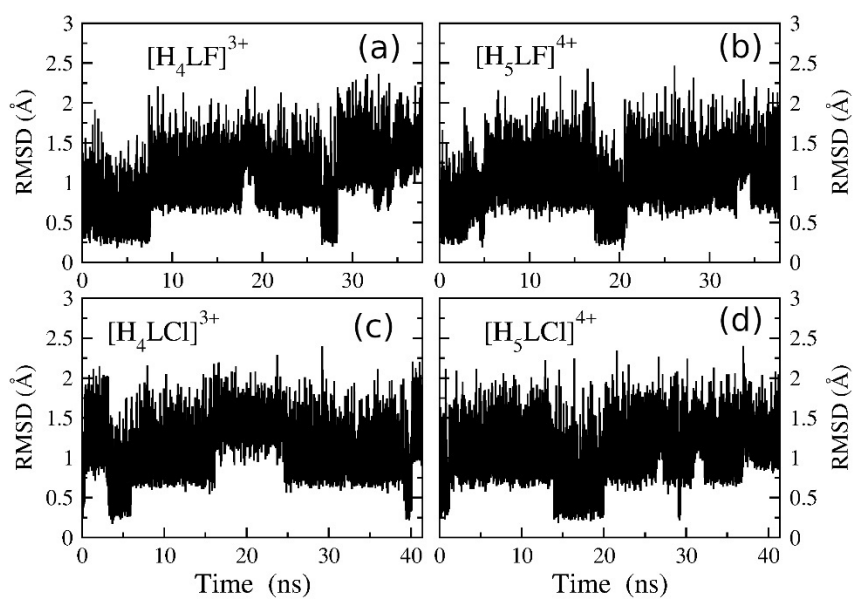

**Figure S7.** RMSD as a function of time calculated from MD simulations of the  $[\text{H}_4\text{LF}]^{3+}$ ,  $[\text{H}_5\text{LF}]^{4+}$ ,  $[\text{H}_4\text{LCI}]^{3+}$  (also reported in Figure S6) and  $[\text{H}_5\text{LCI}]^{4+}$  complexes (a, b, c and d, respectively).

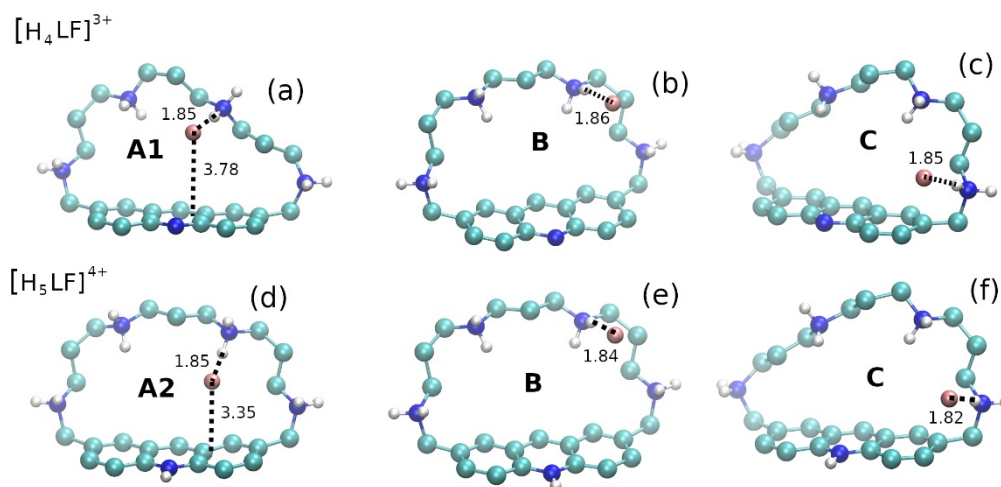

**Figure S8.** Ball and stick representations of the A1 (a), B (b) and C (c) poses related to the  $[\text{H}_4\text{LF}]^{3+}$  complex and A2 (d), B (e) and C (f) poses related to the  $[\text{H}_5\text{LF}]^{4+}$  complex, whose two-dimensional distribution functions of  $R$  and  $\theta$  are displayed in Figure 8 of the main text. The representations are supplied with the relevant H-bond and anion-aromatic plane distances (in Å).

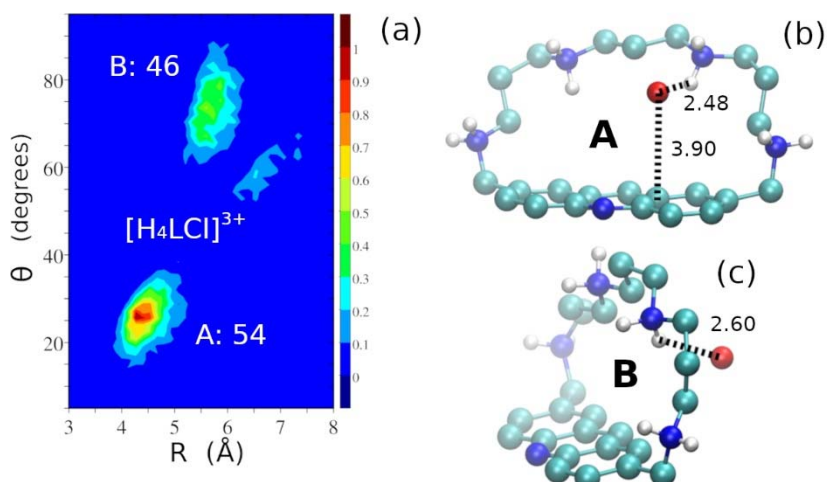

**Figure S9.** Two-dimensional distribution function of  $R$  and  $\theta$  for the  $[\text{H}_4\text{LCl}]^{3+}$  adduct (a). Ball and stick representations of the A (b) and B (c) poses are also displayed, highlighting the relevant H-bond and anion-aromatic plane distances (in Å). Populations are computed according to the geometrical definitions of the poses reported in Table S10 of the present report.

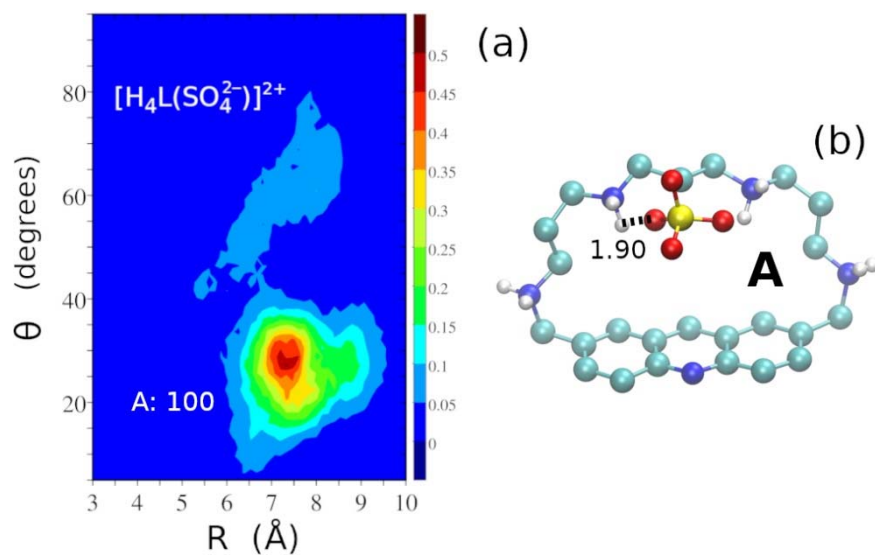

**Figure S10.** Two-dimensional distribution function of  $R$  and  $\theta$  for the  $[H_4L(SO_4)]^{2+}$  adduct (a). Ball and stick representation of the only A pose (b) is also displayed, highlighting the relevant H-bond distance (in Å).
